# Supplementary material for: High nonpublication rate from publication professionals hinders evidence-based publication practices
Source: PeerJ. 2016 May 10;4:e2011. doi: 10.7717/peerj.2011 (PMC4867735; doi:10.7717/peerj.2011)
Supplement: Data S1 [file peerj-04-2011-s001.xlsx]

## Sheet: Raw Data
		Acceptance rate by year	Poster	Oral presentation		Authorship									Article type			Funding source declared in abstract(Y/N)	Funding Source				Published (Y/N)	MEDLINE citation URL	Journal name	Time from conference to manuscript publication (mths)	Funding statement included in publication (Y/N); includes statement re. no external funding	Change in authorship (Y/N)	Number of authors in publication	Altmetrics Score (if available)	Journal Impact Factor (current ie 2014 / 2015)	Free to access
					Full author list	# of US	Affiliation	# of EU	Affiliation	# of AP	Affiliation	# of LA	Affiliation	Total number of authors on the abstract	Interventional	Observational	Opinion piece		Industry	Government	Other
2014-04-01
	abstract title
1	A combined qualitative/quantitative survey assessment of publication steering committee usage patterns and operationalization		X		Brian Scheckner, Kenneth Pomerantz, Gina D’Angelo and Christopher Rains	3	Shire, Wayne, PA, USA; Boehringer Ingelheim Pharmaceuticals Inc., Ridgefield, CT, USA	1	Shire, Eysins, Switzerland					4		X		N					N
1	An analysis of Twitter activity of pharmaceutical companies and tweets relating to publication activity		X		Sarah Feeny, Ray Magee, Elaine Wilson			3	Complete Medical Communications, Macclesfield, Cheshire, UK, McCann Complete Medical, Cheshire, UK					3		X		N					N
1	Experiences with open access journals: a survey of publication professionals		X		Kim Coleman Healy, Aruna Seth, Thomas Gegeny, Diane Hoffman	4	Envision Scientific Solutions, Southport, CT, USA, Excel Scientific Solutions, Southport, CT, USA, Engage Scientific Solutions, Southport, CT, USA							4		X		N					N
1	Development of an authorship algorithm for industry sponsored clinical trials		X		Gina Fusaro, Robert Matheis, Al Weigel	3	Celgene Corporation, Summit, NJ, USA, International Society for Medical Publication Professionals (ISMPP), Tarrytown, NY, USA							4			X	N					N
1	Digital evolution of medical journals in 2013		X		Samantha Collings, Lucinda Huxley, David Haworth, Wasim Rashid, Angela Cairns, Gregory Thompson	1	KnowledgePoint360 Group, Lyndhurst, NJ, USA	5	KnowledgePoint360 Group, Macclesfield, Cheshire, UK,					6		X		N					N
1	Are industry-sponsored clinical trials cited more than trials sponsored by government, not-for-profit or academia? A review of oncology journals at Nature Publishing Group		X		Neil Adams, Jamie Feigenbaum, Kathleen Lyons, Pooja Aggarwal, Martin Delahunty	3	Nature Publishing Group, New York, NY, USA	2	Nature Publishing Group, London, UK					5		X		N					N
1	Assessment of publication metrics: Google Scholar vs.PubMed Central		X		Kathleen Covino, Michele Patton, Melanie Blanchard, Piyali Dhar Chowdhury, Gina Fusaro	5	Nucleus Global, Hamilton, NJ, USA, Nucleus Global, Atlanta, GA, USA, Celgene Corporation, Summit, NJ, USA							5	X			N					N
1	Author guidance on self-plagiarism: a review of top tier journal guidelines		X		Joshua Fink, Elizabeth Harvey, Diane Hoffman	1	Engage Scientific Solutions, Southport, CT, USA	2	Engage Scientific Solutions, London, UK					3		X		N					N
1	Author perceptions: impact of the Physician Payment Sunshine Act (PPSA) on publications		X		Shawn J. Boyle, Colleen Hedge	2	Synchrony Medical Communications LLC, West Chester, PA, USA							2		X		N					N
1	Bad news travels furthest: the social media impact of publications around trial disclosure and medical writing		X		Tom Rees, Euan Adie, Sheelah Smith			3	PAREXEL International, Worthing, UK, Altmetric LLP, London, UK					3		X		N					N
1	Best practices for sharing clinical trial results with participants: insights from China		X		Karen L. Woolley, Janelle R. Keys, Julie A. Monk					3	ProScribe Medical Communications, Noosa Heads, QLD, Australia; University of the Sunshine Coast, Maroochydore DC, QLD, Australia, University of Queensland, Brisbane, QLD, Australia					X		N					N
1	Challenges in identifying published registration studies for FDA-approved pharmaceuticals		X		Kim Pepitone, Sandeep Kamat	1	Cactus Communications, Trevose, PA, USA			1	Cactus Communications, Mumbai, India			2			X	N					N
1	Clinical trials – commitment to publish		X		LaVerne A. Mooney, Amy Nathan, Stephanie Ring, Lorna Fay	4	Pfizer Inc., New York, NY, USA							4			X	N					N
1	Collaboration, cooperation and compliant scientific communications: identifying local market needs			X	Julie Newman, Alan Hempel	1	Bristol-Myers Squibb, Plainsboro, NJ, USA			1	Bristol-Myers Squibb, Melbourne, VIC, Australia			2			X	N					N
1	Commercial and health economics and outcomes research (HEOR) group involvement in publication strategies and plans: a benchmark assessment		X		Cherie Whitmore, Yeshi Mikyas, Tricia L. Gooljarsingh	3	Knowledgepoint360 Group, Lyndhurst, NJ, USA, Baxter Healthcare Corporation, Westlake Village, CA, USA							3		X		N					N
1	Comparison of the publication policies and guidelines of major medical journals and professional associations		X		Frank J. Rodino, Philip Thoman, Nick Tobenkin, Al Weigel	4	Churchill Communications, Maplewood, NJ, USA, Springer Healthcare, St. Louis, MO, USA, Advocacy Associates, Washington, DC, USA, International Society for Medical Publication Professionals (ISMPP), Tarrytown, NY, USA							4		X		N					N
1	Delegate interactions with congress posters: current preferences and future opportunities		X		Paul Farrow, Fran Young, Annabelle Ballsdon, Michael Molloy-Bland, Chris Rains	1	Shire Development LLC, Wayne, PA, USA	4	Oxford PharmaGenesis Ltd, Oxford, UK; Shire AG, Eysins, Switzerland					5		X		N					N
1	Factors influencing manuscript development time		X		Joelle Suchy, Suzanne Van de Water, Catherine Martin, Roger McCarter, Beth Burke	5	Nucleus Global, Hamilton, NJ, USA, Nucleus Global, Atlanta, GA, USA							5		X		N					N
1	Implementation of standard, globally aligned publication development processes in the Asia-Pacific region (APAC)		X		Susan Nastasee, Julie Newman, Dan Henderson, Balaji Ganesan, Naomi Ishibashi, Jimmy Chiu, Wenlong Shao, Neil Baker, Ananya Bhattacharya and Brenda Connor	3	Global Medical Publications, Bristol-Myers Squibb, Princeton, NJ, USA	2	Envision Pharma Group, Horsham, West Sussex, UK	5	Regional Strategic Medical Communications, Bristol-Myers Squibb, Melbourne, VIC, Australia; Bristol-Myers K.K., Tokyo, Japan; Regional Strategic Medical Communications, Bristol-Myers Squibb, Shanghai, China			10			X	N					N
1	Journal policies regarding medical writing assistance and industry sponsorship		X		Grace Lee, Emma Platt, Monica Dodge	3	Scientific Therapeutics Information Inc., Madison, NJ, USA							3		X		N					N
1	Lack of consistency in use of value terminology in medical publications		X		Nathan White	1	NucleusX Market Access, Atlanta, GA, USA							1		X		N					N
1	Leveraging peer-reviewer comments			X	Lorna Fay, LaVerne A. Mooney	2	Pfizer Inc., New York, NY, USA							2			X	N					N
1	Measuring influence of company-sponsored manuscripts		X		Angela Sykes, Mollie McKillop	2	Pfizer Inc., New York, NY, USA, Columbia University, New York, NY, USA							2	X			N					N
1	Measuring publication impact using article-level metrics (altmetrics)		X		Ted Huang, Janet Davies, Kate Weatherall, Sunil Joseph, Matthew Wadyka	2	Nucleus Global, Hamilton, NJ, USA, Genentech Inc., San Francisco, CA, USA	3	Nucleus Global, London, UK,					5	X			N					N
1	Perception by medical communications professionals of online communal annotation of journal articles		X		Steven Tresker , Shruti Baijal					2	Cactus Communications, Mumbai, India			2		X		N					N
1	Perceptions of CMPP certification among certified and noncertified ISMPP members		X		Elizabeth Bennett, Steven Palmisano, Ken Truman, Paula Farmer, Chris Lawrence, Jared Canady	6	Clarity Consulting LLC, Raleigh, NC, USA, MedThink SciCom, Raleigh, NC, USA, MedThink Inc., Raleigh, NC, USA							6		X		N					N
1	Preferences and practices of physicians in consumption of medical literature		X		Todd Parker, Angie Miller, Ken Truman, Chris Farlow, Jon Hudson, Susan Taylor	6	MedThink SciCom, Raleigh, NC, USA, MedThink Inc., Raleigh, NC, USA							6		X		N					N
1	Public disclosure of clinical trial results: is the glass 80% full or 20% empty?		X		Bill Kadish, Kate Bradford, Sheelah Smith	1	PAREXEL International, Hackensack, NJ, USA	2	PAREXEL International, Uxbridge, UK, PAREXEL International, Worthing, UK					3		X		N					N
1	Social media activity for optimizing publication timing in accordance with drug approval		X		Ira Mills, Hajira B. Koeller, Nathaniel Hoover, Ken Youngren, Sheelah Smith	4	PAREXEL International, Hackensack, NJ, USA	1	PAREXEL International, Worthing, UK					5		X		N					N
1	The e-Compendium: an innovative cross-functional platform for scientific statements		X		Manon Boisclair, Nick Combates, Robert Matheis, Susan Pacconi, Debbie Wolinsky, Dan Sinsimer, Lisa Chang, Tina Huang	8	Celgene Corporation, Summit, NJ, USA, Nucleus Global, Hamilton, NJ, USA							8		X		N					N
1	The potential use of alternative article metrics to predict long-term scientific impact			X	Kevin Ryder, Tracy Johnson, Ross Ruriani, Neil Adams	4	CHC Group, Chadds Ford, PA, USA, Dove Medical Press, Princeton, NJ, USA, Nature Publishing Group, New York, NY, USA							4		X		N					N
1	Trends in new drug approvals and clinical trial publications over a 2-decade interval		X		Charlene Rivera, Ken Truman, Todd Parker, Steven Palmisano	4	MedThink SciCom, Raleigh, NC, USA, MedThink Inc., Raleigh, NC, USA							4		X		N					N
1	Trends in the acknowledgement of professional medical writers for publication of clinical trial data		X		Disha Dayal, Ruchika Agrawal, Yoganand Duppalapudi					2	CACTUS Communications Ltd, Mumbai, India			2		X		N					N
1	Trends in the perception of professional medical writing in the popular press and biomedical journals			X	Joanna Bloom	1	Envision Pharma Group, Southport, CT, USA							1		X		N					N
1	Under-representation of Southeast Asian articles in top-tier journals		X		Catherine Rees, Nicola Ryan, Andrew Sporle					3	Rata Communications Ltd, Auckland, New Zealand, University of Auckland, Auckland, New Zealand			3		X		N					N
1	Understanding industry practices for author selection, engagement and training		X		Tricia L. Gooljarsingh, Christopher Rabbat, Cherie Whitmore	3	Baxter Healthcare Corporation, Westlake Village, CA, USA, Knowledgepoint360 Group, Lyndhurst, NJ, USA							3		X		N					N
2013-04-01
1	A medical writing survey to develop a certification examination		X		Thomas P. Gegeny, Karen Potvin Klein	2	UBC-Envision Group, Southport, CT, USA ,Wake Forest University Health Sciences, Winston-Salem, NC, USA bWake Forest University Health Sciences							2		X		N					N
1	A review of manuscript cycle times from 2009 to 2012: results from a major pharmaceutical sponsor			X	Angela Bickford, Kimberly Marino and Gary Evoniuk	3	GlaxoSmithKline Inc., Collegeville, PA, USA; GlaxoSmithKline Inc., Research Triangle Park, NC, USA							3		X		N					N
1	An automated literature analysis tool to enhance literature searches for publication subcommittees (PSCs) and publication planning		X		Michelle Kissner, Mark Drinkwater, Belinda Stretch and Erica Wright	2	Publications Management, Pfizer Inc., New York, NY, USA; Medical Business Technology, Pfizer Inc., Groton, CT, USA	2	PI2Solutions, Hertfordshire, UK; Information & Library Services, Pfizer Inc., Walton Oaks, UK					4			X	N					N
1	Attitudes of healthcare professionals towards medical writers and pharmaceutical company involvement in publications		X		Tom Rees, Sheelah Smith, Michelle Kelly			3	PAREXEL International, Worthing, UK; EPG Health Media, Tunbridge Wells, UK					3		X		N					N
1	Augmented reality: bringing another dimension to scientific publications		X		Mark Lydiatt, Jessica Gilly, Debra Wolinsky, Suzanne Van de Water, Ted Huang, Jeremy Shannon, Alfred Weigel, Joelle Suchy	8	Nucleus Global, Atlanta, GA, USA; Celgene Corporation, Summit, NJ, USA; Nucleus Global, Hamilton, NJ, USA							8		X		N					N
1	Celgene history books: an innovative and interactive key publication archiving tool		X		Manon Boisclair, Virginia Dariani, Nick Combates, Tina Huang, Eulena Horne, Alison Tozer	6	Global Medical & Scientific Communications, Celgene Corporation, Summit, NJ,							6			X	N					N
1	Clinical trial data - reducing the time to submission		X		LaVerne A. Mooney, Lori Lesko, Cynthia Huang, Kristin Sznajder, Stephanie A. Ring, Mary Belisle, Lorna Fay	7	aPublications Management Team, Pfizer, New York, NY, USA, bWorldwide Safety & Regulatory, Pfizer, Groton, CT, USA, cGlobal Medical Affairs, Pfizer, New York, NY, USA, dExternal Medical Communications Analytics & Reporting, Pfizer, New York, NY, eExternal Medical Communications Transparency, Pfizer, Groton, CT, USA							7		X		N					N
1	Corporate integrity agreements 2012		X		Thomas Babcock, Christopher Rains	1	aGlobal Publications Group, Shire Specialty Pharma, Wayne, PA, USA	1	bGlobal Publications Group, Shire Specialty Pharma, Eysins, Switzerland					2		X		N					N
1	Digital dissemination of scientific poster presentations via quick response (QR) codes: implementation and analytics		X		J.R. Meloro, Kristen Letrent, Joanne C. Ryan, Josephine A. Sollano, Cate Scott		Pfizer Oncology Global Medical Communications, New York, NY, USA, La Jolla, CA,		Pfizer Oncology Global Medical Communications, Walton Oaks, UK					5		X		N					N
1	‘Got GPP skills?’ Skill-building initiative for publication professionals in pharmaceutical industry setting		X		Kimberley Gertsen, Elizabeth Chebli, Ann L. Davis, Susan Nastasee, Jamie Zhang, Diane Moniz Reed	6	Bristol-Myers Squibb, Princeton, NJ, USA							6			X	N					N
1	Guidelines for literature analyses: an agency perspective		X		Doug Taylor, Nipa Patel, Cindy Busch, Gina Mushrock, Monica Salvadore, Philip Sjostedt	6	The Medicine Group, New Hope, PA, USA							6			X	N					N
1	Implementation of an educational program regarding best publication practices and the introduction of publication management software across a global organization		X		Brian Atkinson, Ann L. Davis, Thomas Malieckal, Susan Nastasee, Shannon Pierotti, Jamie Zhang, Ananya Bhattacharya	7	Global Medical Publications, Bristol-Myers Squibb, Princeton, NJ, USA							7			X	N					N
1	Improving data accessibility through innovations in regional publication planning, training, and implementation		X		Luis Perez, Erinn Goldman, Liza O’Rourke, Michael Mandola	4	Nucleus Global, Hamilton, NJ, USA							4			X	N					N
1	Incomplete conflict of interest (COI) disclosures – contribution of medical journal requirements		X		Ira Mills, Christina Campbell, Dominik Wolf, Nathaniel Hoover, Tom Rees, Sheelah Smith	3	PAREXEL International, Hackensack, New Jersey, USA	3	PAREXEL International, Worthing, UK					6		X		N					N
1	Increasing and evolving use of smart technology to access congress posters			X	Fran Young, Paul Farrow, Katharine Murkett and Chris Rains	1	Shire Development LLC, Wayne, PA, USA	2	Oxford PharmaGenesis Ltd, Oxford, UK; Shire AG, Eysins, Switzerland					4			X	N					N
1	Introducing good publications practices in China: a case study in nuance and know-how		X		Julie Newman					1	Research and Development, Bristol Myers-Squibb, Melbourne, Australia			1			X	N					N
1	Kicking off cost-efficient abstracts: factors influencing abstract development time		X		Joelle Suchy, Suzanne Van de Water, Tammie Anderson, Beth Burke	4	Nucleus Global, Hamilton, NJ, USA; Nucleus Global, Atlanta, GA, USA							4		X		N					N
1	Perception of multimedia content by journal editors		X		Craig V. Smith, Brian Jenkins	2	Multimedia Publishing, Elsevier, New York, NY, USA							2		X		N					N
1	Publication agreements or ‘gag orders’? Compliance of publication restrictions with Good Publication Practice 2 (GPP2) for trials on ClinicalTrials.gov		X		Karen L. Woolley, Rebecca A. Lew, Luke C. Carey, Julie A. Ely, Cassandra Haley, Janelle R. Keys, Julie A. Monk, Mark Snape, Mark J. Woolley, Serina Stretton					10	ProScribe Medical Communications, Noosaville, QLD, Australia; University of the Sunshine Coast, Maroochydore DC, QLD, Australia; University of Queensland, Brisbane, QLD, Australia			10		X		N					Y
1	Publication experience in orphan diseases: case study with Cryopyrin-Associated Periodic Syndromes (CAPS)		X		Carol Hudson, Hadi Moini, Linda Williams, Rebecca Gall, S. Bala Dass, Beate Stych	6	Regeneron Pharmaceuticals Inc., Tarrytown, NY, USA							6		X		N					N
1	Publication of health economics and outcomes research (HEOR) data in non-HEOR journals: a literature analysis			X	Jason McDonough, Ashley O’Dunne, Bo Choi	3	MedErgy HealthGroup, Yardley, PA, USA							3		X		N					N
1	Relationship of citations received for published articles to a journal’s impact factor at time of submission		X		Jeffrey W. Clemens	1	Eli Lilly and Company, Indianapolis, IN, USA							1		X		N					N
1	Submitting prior reviews with a previously rejected manuscript when seeking publication in another journal: implications for closing the credibility gap in reporting industry-sponsored clinical research		X		Neil Adams, Fiona Watt, Kathy Lyons, Laura Harper, Martin Delahunty, Julianne Scarpino	3	Nature Publishing Group, New York, NY, USA;	3	Nature Publishing Group, London, UK					6		X		N					N
1	Success at journal of choice and effect of resubmissions on publication timing for Pfizersponsored publications in 2012			X	Elizabeth A. Whann, Stephanie A. Ring, Courtney Leo, Amy B. Nathan, LaVerne Mooney	5	Publications Management Team, Pfizer Inc., Collegeville, PA, USA; External Medical Communications Analytics & Reporting, Pfizer Inc., New York, USA; Publications Management Team, Pfizer Inc., New York, NY, USA							5		X		N					N
1	The evolution of journals from print to enriched media: an assessment of journal digital characteristics		X		Samantha Collings, Gregory Thompson, Angela Cairns, Rebecca Goldstein	2	KnowledgePoint360 Group, Lyndhurst, NJ, USA	2	KnowledgePoint360 Group, Macclesfield, Cheshire, UK					4		X		N					N
1	Transparency in publications: reporting of funding, conflicts of interest and writing assistance – call for standardized declaration for reporting		X		Margaret Haugh			1	MediCom Consult, Villeurbanne, France					1		X		N					N
1	Trends in clinical trial publication in open-access journals		X		Jillian Gee, Rebecca Slager, Todd Parker, Steven Palmisano	4	MedThink SciCom, Raleigh, NC, USA							4		X		N					N
1	Trends in the perception of industry-related medical publications		X		Kanaka Sridharan, Melissa Drelich, Erin Hufman	3	Novartis Pharmaceuticals Corporation, East Hanover, NJ, USA							3		X		N					N
1	Twitter hashtag usage at medical conferences: follow-up analysis		X		Kathryn Robinson, Todd Parker, Steven Palmisano	3	MedThink SciCom, Raleigh, NC, USA							3		X		N					N
1	Worldwide implementation of a publication planning and development policy		X		Joelle Urrutia, Heather Sun, Kimberly Cushing, Stephanie Rock, Karen Pinette, Nancy Griffith	6	Biogen Idec, Weston, MA, USA							6			X	N					N
2012-04-01
1	A survey of global publication practices for authors of commercially-sponsored original research and review articles		X		Bryce McMurray, Iain Spray, Diana Faulds and Neil Lamont			2	inScience Communications, Chester, UK: Wolters Kluwer, Chester, UK	1	Adis, Auckland, New Zealand			3		X		N					N
1	Acceptance and utilization of digital congress poster presentations: a survey of medical publication professionals		X		Melissa S. McGrath and Richard J. Fisher	1	Medical Affairs, Department of Cardiovascular þ Metabolic Medicine, Boehringer Ingelheim, Ridgefield, CT, USA	1	Scientific Affairs, Global Clinical Development þ Medical Affairs, Boehringer Ingelheim, Ingelheim am Rhein, Germany					2		X		N					N
1	A survey of medical publication professionals on the role of copy editors		X		Russell A. Gazzara, Susan Collins and Christina Rogers	3	ReSearch Pharmaceutical Services, Inc., Fort Washington, PA, USA							3		X		N					N
1	Accesses versus citations: why you need to measure both to assess publication impact		X		Tom Rees, Katherine Ayling-Rouse and Sheelah Smith			3	PAREXEL International, Worthing, UK					3		X		N					N
1	An analysis of industry-funded studies published in the New England Journal of Medicine		X		Sarah Feeny, Ray Magee, Stephanie Tortell, Elaine Wilson and Alice Choi			5	Complete Medical Communications Ltd, Macclesfield, UK; Complete Medical Group Worldwide Ltd, Macclesfield, UK					5		X		N					N
1	Benchmarking Twitter hashtag usage at medical conferences		X		Ginny Boland, Todd Parker, Steven Palmisano, Paula Farmer and Angie Miller	5	MedThink SciCom, Raleigh, NC, USA							5		X		N					N
1	Authorship criteria in medical journals: a review of guidance		X		Jackie Marchington, Ally Bexfield and Catherine Kidd			3	Caudex Medical, Oxford, UK					3		X		N					N
1	Benchmarking Twitter usage among scientific journals			X	Todd Parker, Ginny Boland, Steven Palmisano and Angie Miller	4	MedThink SciCom, Raleigh, NC, USA							4		X		N					N
1	Can free online tools help publication professionals identify therapeutic area experts and target journals?		X		Karen L. Woolley, Narelle J. Bramich, Julie A. Monk, Luke C. Carey and Cassandra D. Haley					5	ProScribe Medical Communications, Noosaville, QLD, Australia; University of Queensland, St Lucia, QLD, Australia; University of the Sunshine Coast, Sippy Downs, QLD, Australia; ProScribe Medical Communications, Melbourne, VIC, Australia; ProScribe Medical Communications, Wollongong, NSW, Australia			5		X		N					N
1	Corporate integrity agreements 2007–2011			X	Thomas Babcock, Jamie Kendall and Christopher Rains	2	Global Publications Group, Shire Specialty Pharma, Wayne, PA, USA; Compliance Implementation Services (CIS), Media, PA, USA	1	Global Publications Group, Shire Specialty Pharma, Eysins, Switzerland					3		X		N					N
1	Case reports: expanding clinical knowledge		X		John Fallows, Sara Eve and Iain Hrynaszkiewicz			3	BioMed Central, London, UK					3			X	N					N
1	Corporate integrity agreements: what they say about publications, publication planning, transparency, and ICMJE		X		Frank J. Rodino	1	Churchill Communications, Maplewood, NJ, USA							1		X		N					N
1	Development and implications of a redacted clinical trial protocol for posting online with the published manuscript			X	Namit Ghildyal, Yvette Ng, Craig Tendler, Chris H. Takimoto and Susan Glasser	5	Janssen Research & Development, LLC, Raritan, NJ, USA; Janssen Global Services, Raritan LLC, Raritan, NJ, USA							5			X	N					N
1	Industry-sponsored clinical trials: time to publication		X		Marla Mathias, K. Elizabeth LaFlamme and Tracy H. Johnson	3	Complete Healthcare Communications, Inc., Chadds Ford, PA, USA							3		X		N					N
1	Evaluating factors influencing timelines for publication submission after implementation of GPP2 guidelines–raising the bar to shorten timelines			X	Kanaka Sridharan, Mike McNamara, Laura Hendrickson and Erin Hufman	4	Novartis Pharmaceuticals Corporation, East Hanover, NJ, USA; Oxford PharmaGenesis Inc., Newtown, PA, USA									X		N					N
1	Innovative, evidence-based, practical primer tools for publication professionals working with authors in the Asia-Pacific region		X		Rebecca A. Lew, Julie A. Ely, Jason Khoh and Karen L. Woolley					4	ProScribe Medical Communications, Melbourne, VIC, Australia; ProScribe Medical Communications, Sydney, NSW, Australia; ProScribe Medical Communications, Noosaville, QLD, Australia; University of Queensland, St Lucia, QLD, Australia; University of the Sunshine Coast, Sippy Downs, QLD, Australia			4			X	N					N
1	Journal impact factors benefit from the content of pharma-affiliated authors		X		Leighton Chipperfield, Matthew Richardson and Andrew Plume			3	Elsevier Ltd, Oxford, Oxfordshire, UK					3		X		N					N
1	Monitoring the external publications environment: identifying and communicating significant developments to key stakeholders in a corporate setting		X		Geoff Smith, Jon Nilsen, Shawn Lee, Mee Rhan Kim, Dikran Toroser, Erica Rockabrand, Larry Kovalick, Juli Clark and Lucy Hyatt	8	Amgen Inc., Thousand Oaks, CA, USA	1	Amgen (Europe) GmbH, Zug, Switzerland					9			X	N					N
1	Making the grade: analysis of performance on the ISMPP CMPP examination		X		Robert J. Matheis and Kim Pepitone	2	Sanofi, Bridgewater, NJ, USA; International Society for Medical Publication Professionals, Briarcliff Manor, NY, USA							2		X		N					N
1	Novel approaches to conveying scientific communication outputs		X		Sheryl Selvey, Samantha Llanos, Erin Harvey and Lisa Underhill	4	Genzyme, a Sanofi Company, Cambridge, MA, USA							4			X	N					N
1	Positive and negative trial data: are there publication differences?		X		John Besemer, Ray Ashton, Tom Rees, John Kincaid and Sheelah Smith	2	PAREXEL International, Hackensack, NJ, USA	3	PAREXEL International, Worthing, UK					5		X		N					N
1	Perceived challenges to open peer review and opportunities for education		X		Kristen Clark, Lisa Tamayne and Carol Berry	3	Quintiles Medical Communications, Parsippany, NJ, USA							3		X		N					N
1	Plagiarism in medical publications: practical solutions for maintaining integrity in the industry		X		Doug Taylor, Cindy Busch, Gina Mushrock and Philip Sjostedt	4	The Medicine Group, New Hope, PA, USA							4		X		N					N
1	Publication planning at one pharmaceutical company: a guidance document creation to ensure compliance with industry best practices and laws		X		Gina D’Angelo, Brian Scheckner and Slavka Baronikova	2	Global Publications Group, Shire Specialty Pharma, Wayne, PA, USA	1	Global Publications Group, Shire Specialty Pharma, Turnhout, Belgium					3			X	N					N
1	Publication steering committee development at a pharmaceutical company: experience 1-year postdepartmental guidance document development		X		Brian Scheckner, Gina D’Angelo, Amina Elsner, Ju¨ rgen Wiehn and Fran Young	3	Global Publications Group, Shire Specialty Pharma, Wayne, PA, USA	2	Global Publications Group, Shire Specialty Pharma, Eysins, Switzerland					5			X	N					N
1	Social media usage by medical journals: implications for publication planning		X		Ira Mills, Kate Gardner, Mark English, Nathaniel Hoover, Sheelah Smith and Ken Youngren	3	PAREXEL International, Hackensack, NJ, USA	3	PAREXEL International, Worthing, UK					6		X		N					N
1	Ripe’ for change: introducing a new index of publication efficiency		X		Stephen W. Gutkin and Sara B. Glickstein Bar Zeev	2	Rete Biomedical Communications Corp., Wyckoff, NJ, USA							2			X	N					N
1	Streamlining and improving the global publication development process to align with best publication practices		X		Susan Nastasee, Carolyn Carroll, Jamie Zhang, Thomas Malieckal, Ananya Bhattacharya and Samantha Gothelf	6	Bristol-Myers Squibb, Princeton, NJ, USA							6			X	N					N
1	Structuring publication teams to meet global needs –where are we now?		X		Diane Moniz Reed and Cherie Whitmore	2	Bristol-Myers Squibb, Princeton, NJ, USA; Knowledgepoint360 Group, Lyndhurst, NJ, USA							2		X		N					N
1	Use of stakeholder survey feedback for improvement of the publication review and approval process		X		Jean Barilla and Barbara Rowe	2	MedImmune, Gaithersburg, MD, USA							2		X		N					N
1	Systematic review on the prevalence of ghostwriting: misleading, misguided, and mistaken ‘evidence’		X		Serina Stretton and Sericka McGee	1	Hamilton House, Virginia Beach, VA, USA			1	ProScribe Medical Communications, Noosaville, QLD Australia			2		X		N					Y	http://www.ncbi.nlm.nih.gov/pubmed/25023129	BMJ Open	27	Y	Y	1	N	2.063	Y
1	Utilization and attitudes on technological advances in medical publications			X	Carol Hudson, Elizabeth Cecere, Ramana Yalamanchili, Mary Anderson, Michael Pucci, Deana Aloia and Brian Scheckner	7	SCI Scientific Communications & Information, Inc, Parsippany, NJ, USA; Global Publications Group, Shire Specialty Pharma, Wayne, PA, USA										X	N					N
2011-04-01
1	Analyzing the landscape of author instructions for general medicine journals: past and present		X		Laura M. Miesle, Teresa A. Oblak, Lamara D. Shrode and Amy M. Horton	4	The JB Ashtin Group, Inc., Plymouth, MI, USA							4		X		N					N
1	Assessment of good publication practice in medical communications companies’ online descriptions of capabilities		X		Andrew A. Napoli	1	Cephalon, Inc., Frazer, PA, USA							1		X		N					N
1	Characterization of awareness and application of publications guidelines among pharmaceutical professionals		X		Steven Palmisano, Lawrence Nelson, Todd Parker, Kathryn Robinson and Angie Miller	5	MedThink SciCom, Raleigh, NC, USA							5		X		N					N
1	Comparative effectiveness research in the United States: implications for publication planners		X		William Watkins, Alexandra Silveira, Christopher Bailey	3	PPSI Inc., a PAREXEL company, Stamford, CT, USA	1	PPSI Inc., a PAREXEL company, Worthing, UK					4		X		N					N
1	Comparison of results reporting on ClinicalTrials.gov by funding source			X	Jennifer L. Giel	1	UBC-Envision Group, Philadelphia, PA, USA							1		X		N					N
1	Correlating open access article views with citations using four databases		X		Jeffrey Fletcher, Stella Chow	2	AstraZeneca Pharmaceuticals LP, Wilmington, DE, USA; Scientific Connexions, Newtown, PA, USA							2		X		N					N
1	Create a scientific publications guidance document to ensure continued awareness and compliance with industry best practices, regulations, guidances, and laws		X		Brian Scheckner, Thomas Babcock, Fran Young and Jamie Ghen	4	Shire Development Inc., Wayne, PA, USA; Compliance Implementation Services, LLC, Media, PA, USA							4			X	N					N
1	Current and future publication practices: a survey of attendees at ISMPP 2010		X		Cate Foster, Jenna Steere, Lisa Sullivan, Julie Beeso and Jo Oswald	2	Watermeadow Medical USA, New York, NY, USA	2	Watermeadow Medical plc, Witney, UK					5		X		N					N
1	Do medical journals have consistent authorship policies and procedures? A randomized survey		X		Bill Kadish, Christopher Bailey and Sheelah Smith	2	PPSI Inc., a PAREXEL company, Stamford, CT, USA	1	PPSI Inc., a PAREXEL company, Worthing, UK					3		X		N					N
1	Evidence-based guidance for publication professionals on publication misconduct and plagiarism		x		Serina Stretton, Narelle J. Bramich, Julie A. Monk, Janelle R. Keys, Cassandra Haley, Rachel Cameron, Julie A. Ely, Mark J. Woolley and Karen L. Woolley					9	ProScribe Medical Communications, Noosaville, QLD, Australia; University of the Sunshine Coast, Sippy Downs, QLD, Australia			9		X		N					Y	http://www.ncbi.nlm.nih.gov/pubmed/22978774	CMRO	18	Y	Y	8	Not available	2.372	N
1	Expediting timelines of publication submission using a publications steering committee approach		X		Kanaka Sridharan, Mike McNamara and Erin Hufman	3	Novartis Pharmaceuticals Corporation, East Hanover, NJ, USA; Oxford PharmaGenesis, Inc., Newtown, PA, USA							3			X	N					N
1	Familiarity of non-industry authors with good publication practice and clinical data reporting guidelines		X		Jason McDonough, Ashley O’Dunne, Bo Choi, Bob Margerum and Danita Sutton	5	MedErgy HealthGroup, Yardley, PA, USA							5		X		N					N
1	Impact of a structured training program on development of medical writers			X	Jackie Marchington, Tina Kohnstam and Janet Brandon			3	Caudex Medical Ltd, Oxford, UK					3	X			N					N
1	Incorporating 21st century technology to modernize scientific posters			X	Julie Newman and Geoff Tainton					2	Bristol-Myers Squibb Australia Pty Ltd, Melbourne, VIC, Australia; TonicApps, Brisbane, QLD, Australia			2	X			N					N
1	Monitoring the external publications environment: one company’s commitment to ensuring the highest standards in medical publications		X		Meera Kodukulla, Jon Nilsen, Geoff Smith, Michele Vivirito, Scott Silbiger, Juli Clark and Mee Rhan Kim	7	Amgen Inc., Thousand Oaks, CA, USA							7			X	N					N
1	Publication practices in medical technology and pharmaceutical companies		X		Mary Jo Williams, Michael Wittek and Angeline Carlson	3	Medtronic, Inc., Minneapolis, MN, USA; Data Intelligence Consultants, LLC, Eden Prairie, MN, USA							3		X		N					N
1	Publications and regulation: are we strangling the science?		X		Victoria Blasberg, Julie Collins, Beth Ann McGhee, Ira Mills, Eleanor O’Rangers, Stefanie Rubino, Kimberly Trimblett and Debra Wolinsky	8	Embryon, Somerville, NJ, USA							8		X		N					N
1	Scientific platforms: building a scientific foundation for education		X		Todd Parker, Lawrence Nelson, Angie Miller, Kathryn Robinson and Steven Palmisano	5	MedThink SciCom, Raleigh, NC, USA							5		X		N					N
1	Solutions for challenges faced by professionals publishing clinical data – survey results		X		Mukund Nori, Beth Young, Cara Coffey and Dan Donovan	3	UBC-Envision Group, Southport, CT, USA							4		X		N					N
1	Survey of conflict of interest disclosure policies of Asian medical journals		X		Sheryl Zhou, Christopher Bailey, Ken Youngren and Sheelah Smith	3	PPSI Inc., a PAREXEL company, Stamford, CT, USA	1	PPSI Inc., a PAREXEL company, Worthing, UK					4		X		N					N
1	The expanding use of health outcomes and economic evaluations in clinical publications: an example from cardiovascular disease literature		X		Shelley Reich, Bagi Ravishankar, Nes Elipenahli and Sheelah Smith	3	PAREXEL MedCom, Hackensack, NJ, USA; PAREXEL MMS, a PAREXEL company, Hackensack, NJ, USA	1	PAREXEL MMS, a PAREXEL company, Worthing, UK					1		X		N					N
1	The role of the medical publication professional in achieving ethics standards in the publication of clinical trial results		X		Francis P. Crawley			1	Good Clinical Practice Alliance – Europe, Brussels, Belgium; Strategic Initiative for Developing Capacity in Ethical Review, Geneva, Switzerland					1		X		N					N
1	The use of citation factors as a measure of publication planning success		X		Kevin Ryder, Tracy Johnson and James Shea	3	Complete Healthcare Communications, Inc., Chadds Ford, PA, USA							3		X		N					N
1	Threaded publications – the future of scientific communication?			X	John Fallows, Iain Hrynaszkiewicz and Helene Faure			3	BioMed Central, London, UK					3			X	N					N
1	Trends in medical writing acknowledgment in medical journals over the last decade			X	Mee Rhan Kim, Jon Nilsen, Geoff Smith, Ali Hassan, Scott Silbiger, Michele Vivirito and Meera Kodukulla	7	Amgen Inc., Thousand Oaks, CA, USA; Complete Healthcare Communications, Inc., Chadds Ford, PA, USA							7		X		N					N
1	US medical school policies and perceptions regarding collaboration with industry on medical publications: follow-up to the 2009 survey		X		Jeffrey Frimpter, Robert Matheis, Raj Patel and Alfred Weigel	3	sanofi-aventis U.S. Inc., Bridgewater, NJ, USA; Boehringer Ingelheim Pharmaceuticals, Inc., Ridgefield, CT, USA							3		X		N					N
2010-04-01
1	A novel ‘strength-of-voice’ metric to evaluate quality of publications		X		Mukund Nori, Joanna Bloom, Beth Young, Cara Coffey and Dan Donovan	5	UBC-Envision Group, Southport, CT, USA						5				X	N					N
1	Acceptance rate analysis for Pfizer-supported manuscripts			x	LaVerne Mooney, Daireen Garcia and Lorna Fay	3	Pfizer, Inc., New York, NY, USA						3			X		N					N
1	A survey of adherence to the Consolidated Standards of Reporting Trials (CONSORT) guidelines for abstracts		X		Lakshimi Venkatraman, Nimita Limaye, Susan Glasser and Wendy Battisti	2	Johnson & Johnson Pharmaceutical Research & Development LLC, Raritan, NJ, USA			2	Siro Clinpharm Pvt. Ltd, Mumbai, India					X		N					N
1	Acknowledgment of medical writers in medical journal articles: a comparison from the years 2000 and 2007		X		Susan A. Nastasee	1	Pfizer, Inc., Collegeville, PA, USA							1		X		N					N
1	An assessment of author disclosure requirements by medical congresses		X		Russell A. Gazzara and Christina M. Rogers	2	ReSearch Pharmaceutical Services, Inc., Fort Washington, PA, USA							2		X		N					N
1	Authorship above reproach: Amgen’s continuing commitment to maintain the integrity of scientific publications		X		Vidya Setty, Robert Ahlstrom, Kathryn Boorer, Erica Rockabrand, Dikran Toroser, Michelle Zakson, Holly Zoog and Juli Clark	8	Amgen Inc., Thousand Oaks, CA, USA							8			X	N					N
1	An ICMJE journal survey: what is the extent of the trend toward rejecting industry-sponsored publications?		X		Victoria Blasberg, Julie Collins, Monica Gunther and Debra Wolinsky	4	Embryon, Somerville, NJ, USA							4		X		N					N
1	Authorship, acknowledgement, serology and statistics: a study of vaccine literature in the 1980s,1990s, and 2000s		X		Lisa DeTora	1	Novartis Vaccines and Diagnostics, Cambridge, MA, USA							1		X		N					N
1	Awareness and attitudes for guidelines and policies on authorship of clinical publications			x	Michael Pucci, Ramana Yalamanchili, Mary Anderson, Elizabeth Cecere and Deana Aloia	5	Health Learning Systems, Parsippany, NJ, USA							5		X		N					N
1	Clinical trial identifiers in publications and accessibility of clinical trial data		X		Jennifer L. Giel and Susan M. Kaup	2	UBC-Envision Group, Philadelphia, PA, USA							2		X		N					N
1	Best practices for development of non-primary data publications: a needs-based approach		X		Henry W. Singer	1	Publication CONNEXION, Newtown, PA, USA							1			X	N					N
1	Comparison of journal guidelines within and across therapeutic areas and healthcare audiences		X		Danita Sutton, Jason McDonough, Staci Deaton, Bob Margerum, Ashley O’Dunne and Bo Choi	6	MedErgy HealthGroup, Yardley, PA, USA							6		X		N					N
1	Compliance in scientific publications: pharma’s response to GPP2		X		Craig Ornstein, Ira Mills, Michael J. Stevinson and Sheri Cappucci	4	Embryon, Somerville, NJ, USA							4		X		N					N
1	Improving staff assessment and understanding of compliance guidelines		X		Greg Thompson, Angela Cairns and Yvonne Yarker	2	KnowledgePoint360 Group, Secaucus, NJ, USA; Scientific Connexions, Newtown, PA, USA	1	KnowledgePoint360 Group, Macclesfield, Cheshire, UK					3	x			N					N
1	Getting ready for GPP2: the Caudex Medical experience		X		Tina Kohnstam and Liz Bullock			2	Caudex Medical Ltd, Oxford, UK					2			X	N					N
1	Information derived from the ClinicalTrials.gov database: analyses and applications to strategic publication planning			x	Edward P. Paluch, Craig Albright and Kelly Reith	3	Complete Healthcare Communications, Inc., Chadds Ford, PA, USA							3		X		N					N
1	Interactive poster sessions: a case study		X		Rachel Jones, Donna Casparro and Jim Owers	1	PAREXEL, Hackensack, NJ, USA	2	AstraZeneca, Macclesfield, UK; PAREXEL, Worthing, UK					3			X	N					N
1	Optimizing online medical information		X		Amy Walencik, Jeff Pfister, Amy Van Note, Steven Tiger and Kyle Nahrebne	5	Merck, Kenilworth, NJ, USA; Complete Healthcare Communications, Inc., Chadds Ford, PA, USA									X		N					N
1	Medical information access preferences: results of a survey of physician assistants and nurse practitioners		X		Frank J. Rodino and James F. Cawley	2	Churchill Communications, LLC, Maplewood, NJ, USA; The George Washington University, Washington, DC, USA									X		N					N
1	Publication of the results of Chinese trials after registration in ClinicalTrials.gov versus ChiCTR		X		Liu Xuemei, Li Youping, Song Shangqi and Yun Senlin					4	West China Hospital of Sichuan University, Chengdu, China; West China School of Medicine Sichuan University, Chengdu, China					X		N					N
1	Round up the usual suspects? Involvement of medical writers and the pharmaceutical industry in retracted publications			X	Karen L. Woolley, Mark J. Woolley, Rebecca A. Lew, Narelle J. Bramich, Julie A. Ely, Serina Stretton, Julie A. Monk					9	University of Queensland, Brisbane St. Lucia, Australia and University of the Sunshine Coast, Queensland, Australia; ProScribe Medical Communications, Noosaville, Queensland, Australia					X		N					Y	http://www.ncbi.nlm.nih.gov/pubmed/21473670	Curr Med Res Opin	14	Y	Y	8	Not available	2.372	N
1	Sponsored reviews and supplements: current approaches and future trends			x	Elizabeth Crane	2	Astellas Pharma Global Development, Inc., Deerfield, IL, USA; Elsevier, New York, NY, USA	1	ACUMED, Tytherington, Cheshire, UK					3		X		N					N
1	Speaking of value: the need for common terminology for communicating health economic information		X		Shelley Reich and Eleanor Bull	2	PAREXEL, Hackensack, NJ, USA							2			X	N					N
1	Survey of conflict of interest disclosure policies of medical journals		X		Christopher Bailey, Sheelah Smith, Ken Youngren and Bill Kadish	3	PPSI a PAREXEL company, Stamford, CT, USA	1	PPSI a PAREXEL company, Worthing, UK					4		X		N					N
1	Variation in developing scientific posters: one medical communications agency’s perspective		X		Cynthia Gobbel	1	Scientific Connexions, Newtown, PA, USA							1		X		N					N
2009-04-01
1	Public website disclosure of corporate publication policies and procedures among pharmaceutical companies		X		Robert Matheis and Tina Huang	2	sanofi-aventis US, Bridgewater, NJ, USA							2		X		Y	X				N
1	How clear is transparent? A content analysis of transparency statements used within medical and scientific peer-review publications		X		Al Weigel, Robert Matheis and Tina Huang	3	sanofi-aventis US, Bridgewater, NJ, USA							3		X		Y	X				N
1	Benchmarking medical publication policies, procedures, and practices across pharmaceutical companies			X	Caroline Suh, Nicholas J. Combates, Robert Matheis, Monica Ramchandani-Toddywala, Jeffrey Frimpter, Tina Huang and Al Weigel	7	sanofi-aventis US, Bridgewater, NJ, USA							7		X		Y	X				N
1	Public availability of pharma policies on their role in peer-reviewed publications		X		Sarah Bartlett, Andrew Berrie, Hilary Davidson and Alice Choi			4	Complete Medical Communications and Complete Medical Group, Macclesfield, UK					4		X		N					N
1	Observations on shifting preferences for planning, writing, and management of scientific publications			X	Christina M. Rogers, Amy Wright and Marianne B. Zajdel	3	RPS, Inc., Fort Washington, PA, USA							3		X		N					N
1	The role of medical publications in determining access, coverage, and reimbursement policy for health plans			X	John W. Draper, Albert M. Balkiewicz, Michael J. McLaughlin and Carolyn Clark	4	Peloton Advantage, LLC, Parsippany, NJ, USA							4		X		N					N
1	Achieving best practice: benefits of an electronic publications planning tool		X		Sarah Shearing, Synnøve Smeets, Daniel Henderson and Joseph Brown	4	Envision Technology Solutions, Glastonbury, CT, USA							4				Y			X		N
1	Review of online publication policies: pharmaceutical companies and medical colleges			X	Donna Simcoe	1	AstraZeneca Pharmaceuticals LLC, Wilmington, DE, USA							1		X		N					N
1	A survey of accredited US medical school policies regarding collaboration with industry on secondary publications			X	Jeffrey Frimpter, Robert Matheis, Tina Huang and Al Weigel	4	sanofi-aventis US, Bridgewater, NJ, USA							4		X		Y	X				N
1	Beliefs of US KOLs regarding professionalism in pharmaceutical companysponsored medical publications			X	Sahana Joish, Jennifer Rubio and David Rear	3	Advanced Clinical Concepts, Bridgewater, NJ, USA							3		X		N					N
1	Evidence-based approach to publication planning		X		Greg Thompson, Phil Kelly, Patrick Hoggard, Andrew Hughes and Jan Markind	2	Gardiner-Caldwell US, Secaucus, NJ, USA	3	Gardiner-Caldwell London, Berkshire, UK; Gardiner-Caldwell Communications, Cheshire, UK					5				N					N
1	Strengthening the collaboration between authors and publication planners: recommendations from a publications advisory board		X		Jan Markind, Rebecca Goldstein and Randy Gardner-McQuade	3	Gardiner-Caldwell US, Secaucus, NJ, USA; Bristol-Myers Squibb Company, Plainsboro, NJ, USA							3			X	N					N
1	A survey of medical journals’ acceptance of the role of professional medical writers in peer-reviewed publications		X		Kevin Ryder, James Shea and Karen Whalen	3	Complete Healthcare Communications Inc., Chadds Ford, PA, USA							3		X		N					N
1	Development of clinically impactful, scientifically relevant and wholly transparent academic publications: an eight-step, best-practices approach to quality and compliance			X	Henry W. Singer	1	Clinical Connexion, Newtown, PA, USA							1			X	N					N
1	Clinical trial data disclosure: impact on publication policies and disposition			X	Edward Paluch, James Shea and Karen Whalen	3	Complete Healthcare Communications, Inc., Chadds Ford, PA, USA							3		X		N					N
	Number of Abstracts		Posters	Oral		US AU		EU AU		AP AU		LA AU		ALL AU	Interv	Obs	Opin	Source Y	Industry	Gov	Other		Publication
2014	36		32	4		91		28		17		0		134	3	27	6	0	0	0	0		0
2013	30		26	4		98		17		11		0		132	0	21	9	0	0	0	0		1
2012	32		27	5		79		31		11		0		110	0	22	10	0	0	0	0		1
2011	26		21	5		77		13		11		0		100	2	20	4	0	0	0	0		1
2010	25		20	5		65		7		15		0		55	1	18	6	0	0	0	0		1
2009	15		7	8		43		7		0		0		50	0	11	2	5	4	0	1		0
ALL years	164		133	31		453		103		65		0		581	6	119	37	5	4	0	1		4

## Sheet: Summary Data
Data Analyses for Abstracts from CMRO Pub
Year	No. Abstracts	Posters	% Posters	Oral	% Oral	Agency	%	Industry	%	Both	%	Other	%	US AU	% US AU	EU AU	% EU AU	AP AU	% AP AU	LA AU	% LA AU	ALL AU	Interv	% Inter	Obs	% Obs	Opin	& Opin	Source Y	% Source	Industry	% Industry	Gov	% Gove	Other	% Other
2014	36	32	88.8889	4	11.1111	19	52.7778	5	13.8889	6	16.6667	5	13.8889	91	67.9104	28	20.8955	17	12.6866	0	0	134	3	8.33333	27	75	6	16.6667	0	0	0	0	0	0	0	0
2013	30	26	86.6667	4	13.3333	14	46.6667	13	43.3333	1	3.33333	2	6.66667	98	74.2424	17	12.8788	11	8.33333	0	0	132	0	0	21	70	9	30	0	0	0	0	0	0	0	0
2012	32	27	84.375	5	15.625	18	56.25	9	28.125	3	9.375	2	6.25	79	71.8182	31	28.1818	11	10	0	0	110	0	0	22	68.75	10	31.25	0	0	0	0	0	0	0	0
2011	26	21	80.7692	5	19.2308	15	57.6923	3	11.5385	6	23.0769	2	7.69231	77	77	13	13	11	11	0	0	100	2	7.69231	20	76.9231	4	15.3846	0	0	0	0	0	0	0	0
2010	25	20	80	5	20	15	60	4	16	4	16	2	8	65	118.182	7	12.7273	15	27.2727	0	0	55	1	4	18	72	6	24	0	0	0	0	0	0	0	0
2009	15	7	46.6667	8	53.3333	10	66.6667	4	26.6667	1	6.66667	0	0	43	86	7	14	0	0	0	0	50	0	0	11	73.3333	2	13.3333	5	33.3333	4	26.6667	0	0	1	6.66667
ALL years	164	133	81.0976	31	18.9024	91	55.4878	38	23.1707	21	12.8049	13	7.92683	453	77.969	103	17.7281	65	11.1876	0	0	581	6	3.65854	119	72.561	37	22.561	5	3.04878	4	2.43902	0	0	1	0.609756
Data Analyses for Abstracts ISMPP on acceptance
																						% Published
Year	No. submitted	No. accepted	% Accepted																			0.0243902
2014	52	41	78.8462
2013	45	34	75.5556
2012	34	32	94.1176
2011	30	27	90
2010	29	26	89.6552
2009	30	25	83.3333
ALL years	220	185	84.0909

## Sheet: Sheet1
					Column1	Column2	Column3	Column4
